# Supplementary material
Source: publisher figshare collection journal article supplement (https://geolsoc.figshare.com/ndownloader/files/5423141)
Supplement: Supplementary file 1 [file 5423141]

Table S1 Locations, mode of occurrence and phenocryst assemblages of the Wadi Bidi lavas.
Sample name	Latitude (N)	Longitude (E)	above the basement (m)	Mode of occurrence	Mineral assemblages
Lower V2 sequence
09vHil206	24.070799	56.333136	964	Sheet flows	Pl-Ol-Sp
09vHil207	24.070811	56.333115	960	Sheet flows	Aphyric
09vHil208	24.070815	56.33309	956	Sheet flows	Ol-Opx-Cpx
09vHil209	24.070833	56.333086	952	Sheet flows	Aphyric
09vHil210	24.070821	56.332811	947	Sheet flows	Pl-Cpx
09vHil211	24.070791	56.332776	928	Sheet flows	Ol-Opx-Cpx
09vHil212	24.070791	56.332776	926	Sheet flows	Pl-Cpx
09vHil213	24.070797	56.332691	900	Sheet flows	Aphyric
09vHil214	24.070797	56.33203	769	Pahoehoe flows	Pl-Ol-Opx-Cpx
09vHil215	24.070779	56.331913	765	Sheet flows	Pl-Cpx
09vHil216	24.070779	56.331913	762	Sheet flows	Pl-Opx-Cpx
09vHil217	24.070748	56.331886	745	Pillow lavas	Pl-Ol-Cpx
09vHil218	24.070753	56.331822	735	Sheet flows	Pl-Cpx
09vHil219	24.070678	56.331713	725	Sheet flows	Aphyric
09vHil220	23.070676	56.331593	721	Pillow lavas	Aphyric
09vHil221	24.070716	56.331538	713	Pillow lavas	Pl
09vHil222	24.070711	56.331522	704	Pillow lavas	Pl-Ol
09vHil223	24.070733	56.331274	690	Sheet flows	Pl-Ol-Cpx
09vHil224	24.070757	56.331198	670	Sheet flows	Pl-Ol-Cpx-Sp
09vHil225	24.070739	56.331117	657	Pahoehoe flows	Aphyric
09vHil226	24.070598	56.330909	650	Pahoehoe flows	Pl-Ol-Cpx
09vHil227	24.070592	56.330811	640	Sheet flows	Pl-Cpx
09vHil228	24.070521	56.330776	630	Pahoehoe flows	Pl-Cpx-Sp
09vHil229	24.070521	56.330771	615	Pahoehoe flows	Pl-Ol-Opx-Cpx-Sp
09vHil230	24.070387	56.330445	591	Sheet flows	Aphyric
09vHil231	24.070524	56.330628	570	Sheet flows	Ol-Cpx-Sp
09vHil232	24.064642	56.32551	657	Pillow lavas	Aphyric
09vHil233	24.064661	56.325446	640	Sheet flows	Ol-Opx-Cpx
09vHil234	24.064824	56.325309	630	Sheet flows	Pl-Ol-Opx-Cpx
09vHil236	24.064877	56.325299	615	Sheet flows	Pl-Ol
09vHil237	24.06491	56.325311	615	Sheet flows	Aphyric
09vHil238	24.064918	56.325294	587	Sheet flows	Aphyric
09vHil239	24.065127	56.325226	567	Sheet flows	Pl-Ol
09vHil240	24.065264	56.32518	562	Pillow lavas	Pl-Ol-Sp
09vHil241	24.065386	56.325118	553	Sheet flows	Pl-Ol
09vHil242	24.065482	56.32512	548	Pahoehoe flows	Pl-Ol-Opx
09vHil243	24.06581	56.325232	540	Sheet flows	Pl-Ol-Opx-Cpx
09vHil244	24.065846	56.325251	534	Sheet flows	Pl-Ol-Cpx
09vHil245	24.072086	56.325537	435	Sheet flows	Aphyric
09vHil246	24.072117	56.325463	425	Sheet flows	Aphyric
09vHil247	24.072104	56.325396	414	Sheet flows	Aphyric
09vHil248	24.072106	56.325254	396	Pahoehoe flows	Aphyric
09vHil249	247.0721439	56.32524	393	Pahoehoe flows	Ol-Opx-Cpx
09vHil250	24.072004	56.325128	380	Pahoehoe flows	Aphyric
09vHil251	24.071859	56.324936	375	Pahoehoe flows	Pl-Ol-Opx
09vHil252	24.071786	56.324703	357	Pahoehoe flows	Pl-Ol-Opx
09vHil253	24.071734	56.324572	312	Sheet flows	Pl-Ol-Opx
09vHil254	24.071684	56.324263	269	Sheet flows	Pl-Ol-Cpx
09vHil255	24.071517	56.324194	195	Pahoehoe flows	Pl-Ol-Cpx
09vHil256	24.071391	56.323993	172	Pahoehoe flows	Pl-Opx-Cpx
09vHil257	24.071365	56.323879	145	Pahoehoe flows	Pl
09vHil258	24.071933	56.324097	155	Pahoehoe flows	Pl-Ol-Cpx
09vHil259	24.071879	56.32398	163	Pahoehoe flows	Pl-Ol-Cpx
09vHil260	24.071845	56.323901	145	Pahoehoe flows	Pl-Ol-Cpx
10vHil218	24.070593	56.33255	909	Sheet flows	Pl-Cpx
10vHil219	24.070573	56.332505	885	Sheet flows	Pl-Cpx
10vHil220	24.065934	56.325074	511	Sheet flows	Cpx
10vHil221	24.070491	56.325295	492	Pahoehoe flows	Aphyric
10vHil222	24.065809	56.325049	527	Pahoehoe flows	Pl-Ol-Cpx
10SH 21	24.065847	56.322776	2	Pahoehoe flows	Cpx
12SH 11	24.0494026	56.538226	890	Lithic bomb in fissure vent	Aphyric
Upper V2 sequence
09vHil201	24.07085	56.334305	1107	Sheet flows	Ol-Opx-Cpx-Sp
09vHil202	24.070312	56.334072	1105	Sheet flows	Ol-Opx-Cpx-Sp
10vHil201	24.070507	56.334192	1109.5	Lapillituff
10vHil203	24.070525	56.334172	1101	Sheet flows	Ol-Sp
10vHil204	24.070536	56.334134	1096	Sheet flows	Ol-Cpx-Sp
10vHil205	24.070549	56.334099	1092	Sheet flows	Ol
10vHil206	24.070574	56.334056	1085	Sheet flows	Ol-Sp
10vHil207	24.070586	56.334031	1080	Sheet flows	Aphyric
10vHil208	24.070599	56.334006	1075	Sheet flows	Ol-Opx-Cpx
10vHil209	26.070654	56.333977	1070	Sheet flows	Ol-Opx-Cpx-Sp
10vHil210	24.070657	56.333829	1063	Sheet flows	Ol-Sp
10vHil211	24.070674	56.333778	1056	Sheet flows	Ol-Opx-Cpx-Sp
10vHil212	24.070809	56.333709	1044	Sheet flows	Ol-Opx-Cpx-Sp
10vHil213	24.070858	56.33368	1035	Sheet flows	Ol-Opx-Cpx-Sp
10vHil214	24.070806	56.333608	1023	Sheet flows	Ol-Sp
10vHil215	23.070793	56.333525	1005	Sheet flows	Ol-Sp
10vHil216	24.070779	56.33346	986	Sheet flows	Ol-Opx-Cpx-Sp
10vHil217	24.070832	56.333348	977	Sheet flows	Ol-Opx-Cpx
Pl, plagioclase; Ol, olivine; Cpx, clinopyroxene; Opx, orthopyroxene; Sp, spinel.
